# Supplementary material
Source: PubMed Central journal article supplement (PMC2532597)
Supplement: NIHMS60779-supplement-si20050506_041.pdf [file NIHMS60779-supplement-si20050506_041.pdf]

## Supporting Information

**Table 1.** List of receptor type-specific distance constraints for the distance geometry refinement of the model of the active conformation of MC4R.

| <b>H-bond distance constraints (2.9 Å) in MC4R</b> |              |                    |              |                 |              |                    |              |
|----------------------------------------------------|--------------|--------------------|--------------|-----------------|--------------|--------------------|--------------|
| <b>H-Donors</b>                                    |              | <b>H-Acceptors</b> |              | <b>H-Donors</b> |              | <b>H-Acceptors</b> |              |
| <b>Residues</b>                                    | <b>Atoms</b> | <b>Residues</b>    | <b>Atoms</b> | <b>Residues</b> | <b>Atoms</b> | <b>Residues</b>    | <b>Atoms</b> |
| Leu31                                              | N            | Asn120             | Oδ1          | Ser139          | Oγ           | Ala135             | O            |
| Lyz33                                              | Nζ           | Asp113             | Oδ1          | Ser142          | Oγ           | Cys138             | O            |
| Tyr35                                              | Oη           | Ser28              | O            | Arg147*         | Nη1          | Tyr302             | Oη           |
| Tyr35                                              | Oη           | Leu31              | O            | Arg147*         | Nη2          | Tyr212             | Oη           |
| Ser36                                              | Oγ           | Ala114             | O            | Thr150          | Oγ1          | Asp146             | O            |
| Ser47                                              | Oγ           | Glu49              | Oε1          | Arg165*         | Nη1          | Asp146             | Oδ1          |
| Thr53                                              | Oγ1          | Glu49              | O            | Ser171          | Oγ           | Gly167             | O            |
| Ser58                                              | Oγ           | Ser295             | O            | Trp174          | Nε1          | Ser85              | Oγ           |
| Asn62                                              | Nδ2          | Ser58              | Oγ           | Thr178          | Oγ1          | Trp174             | O            |
| Asn72                                              | Nδ2          | Ala68              | O            | Ser188          | Oγ           | Phe184             | O            |
| Lys73                                              | Nζ           | Ala70              | O            | Ser190          | Oγ           | Tyr268             | Oη           |
| Tyr80                                              | Oη           | Glu308             | Oε2          | Ser191          | N            | Asp189             | Oδ2          |
| Ser94                                              | Oγ           | Asp90              | O            | Thr203          | Oγ1          | Ile198             | O            |
| Ser96                                              | Oγ           | Ile125             | O            | Ser210          | Oγ           | Ala206             | O            |
| Asn97                                              | Nδ2          | Glu100             | Oε1          | His222*         | Nδ1          | Asn240             | Oδ1          |
| Thr101                                             | Oγ1          | Asn97              | O            | Arg236*         | Nη2          | Leu229             | O            |
| Thr105                                             | Oγ1          | Thr101             | O            | Asn240*         | Nδ2          | Ala219             | O            |
| Thr109                                             | Oγ1          | Ile103             | O            | Thr248          | Oγ1          | Ala244             | O            |
| Thr112                                             | Oγ1          | Ser116             | O            | Thr270          | Oγ1          | Ile266             | O            |
| Ser116                                             | Oγ           | Glu42              | Oε2          | Ser282          | Oγ           | Gln43              | Oε1          |
| Asn120                                             | N            | Asn108             | Oδ1          | Asn285          | Nδ2          | Phe45              | O            |
| Asn120                                             | Nδ2          | Thr110             | Oγ1          | Asn284          | Nδ2          | Met281             | O            |
| Ile121                                             | N            | Asn108             | Oδ1          | Asn294*         | Nδ2          | Ser136             | Oγ           |
| Asn123                                             | Nδ2          | Glu29              | Oε2          | Ser295          | Oγ           | Met292             | O            |
| Ser127                                             | Oγ           | Asn123             | O            | Arg305*         | Nη2          | Thr246             | Oγ1          |
| Ser131                                             | Oγ           | Ser127             | O            | Arg310          | Nη1          | Leu304             | O            |
| Ser136                                             | Oγ           | Asp298             | Oδ2          | Thr312          | Oγ1          | Gly308             | Oδ           |

\* H-bonds present only in the active conformation of MC4R

| Residues                                   | Atoms | Residues    | Atoms | Distances (Å) |
|--------------------------------------------|-------|-------------|-------|---------------|
| <b>Disulfide bond constraints for MC4R</b> |       |             |       |               |
| Cys40                                      | Cβ    | Cys279      | Cβ    | 4.20          |
| Cys40                                      | Cβ    | Cys279      | Sγ    | 3.05          |
| Cys40                                      | Sγ    | Cys279      | Gβ    | 3.05          |
| Cys40                                      | Sγ    | Cys279      | Sγ    | 2.04          |
| Cys271                                     | Cβ    | Cys277      | Cβ    | 4.20          |
| Cys271                                     | Cβ    | Cys277      | Sγ    | 3.05          |
| Cys271                                     | Sγ    | Cys277      | Gβ    | 3.05          |
| Cys271                                     | Sγ    | Cys277      | Sγ    | 2.04          |
| <b>H-bonds between NDP-MSH and MC4R</b>    |       |             |       |               |
| <b>NDP-MSH</b>                             |       | <b>MC4R</b> |       |               |
| Residues                                   | Atoms | Residues    | Atoms | Distances (Å) |
| Ser1                                       | Oγ    | Asp37       | Oδ2   | 2.90          |
| Tyr2                                       | Oη    | Thr118      | Oγ1   | 2.90          |
| Ser3                                       | Oγ    | Glu42       | Oε1   | 2.90          |
| Glu5                                       | Oε1   | His264      | Nδ1   | 2.90          |
| His6                                       | Nδ1   | Glu100      | Oε2   | 2.90          |
| D-Phe7                                     | N     | Asp126      | Oδ1   | 2.90          |
| Arg8                                       | Nε    | Asp126      | Oδ1   | 2.90          |
| Arg8                                       | Nη1   | Asp122      | Oδ1   | 2.90          |
| Arg8                                       | Nη1   | Thr118      | Oγ1   | 2.90          |
| Trp9                                       | O     | His264      | Nε2   | 2.90          |
| Gly10                                      | O     | Tyr268      | Oη    | 2.90          |
| Lys11                                      | Nζ    | Asp189      | Oδ1   | 2.90          |
| <b>Additional constraints in NDP-MSH</b>   |       |             |       |               |
| Glu5                                       | O     | Arg8        | N     | 2.90          |
| Nle4                                       | Cβ    | Gly10       | Cβ    | 4.50          |
| Asp5                                       | Cβ    | Gly10       | Cβ    | 7.50          |
